# Supplementary material
Source: Springer Nature journal article supplement (https://www.springerprofessional.de/resource/supplementary/13638_2013_846_MOESM6_ESM.pdf/11898596)
Supplement: MOESM6 [file 11898596]

Wired Link

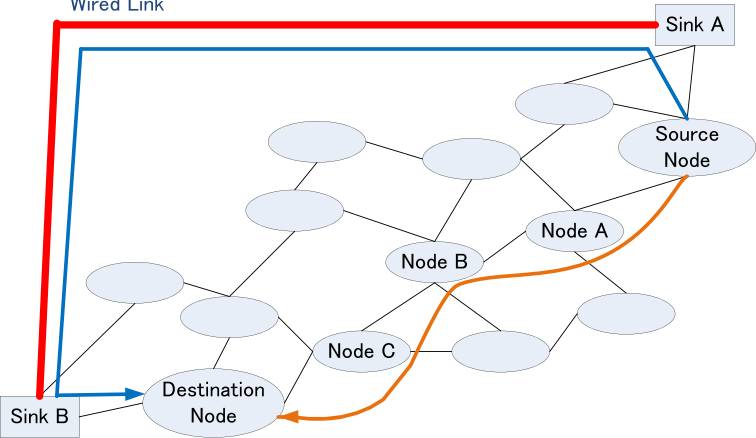

➡ PBAR (2 hops for wireless and 1 hop for wired communication)

➡ The shortest path (4 hops for wireless communication)
